# Supplementary material
Source: PubMed Central journal article supplement (PMC117511)
Supplement: pnas_012364999_1.pdf [file pnas_012364999_1.pdf]

Supporting information for Stone *et al.* (December 26, 2001) *Proc. Natl. Acad. Sci. USA*, 10.1073/pnas.012364999.

**Table 2. PCR and DHPLC conditions**

| STS locus | DHPLC conditions |                     | PCR annealing temperatures, °C |
|-----------|------------------|---------------------|--------------------------------|
|           | Temperatures, °C | Gradient conditions |                                |
| sY15      | 54, 56, 58       | 37/53/61; 1.5/4.0   | 64-54/54 (touchdown PCR)       |
|           | 54, 56           | 45/57/63; 0.5/3.0   |                                |
| sY19      | 64, 66, 68       | 37/53/61; 1.5/4.0   | 64-54/54 (touchdown PCR)       |
|           | 59, 61           | 50/56/60; 1/2       |                                |
| sY65      | 56, 58           | 37/53/61; 1.5/4     | 64-54/56 (touchdown PCR)       |
|           | 55               | 52/58/62; 1/2       |                                |
| sY67      | 64, 66           | 37/53/58; 1.5/4.0   | 64-54/54 (touchdown PCR)       |
|           | 59, 61           | 35/47/55; 1/5       |                                |
| sY74      | 64, 66           | 37/53/56; 1.5/3.0   | 64-54/56 (touchdown PCR)       |
|           | 60, 61           | 35/48/56; 1/5       |                                |
| sY84      | 62, 64, 66       | 45/55/62; 3/3.5     | 64-54/54 (touchdown PCR)       |
|           | 58, 59           | 52/58/62; 1/2       |                                |
| sY85      | 62, 66           | 50/59/66; 1/3.5     | 64-54/54 (touchdown PCR)       |
|           | 57, 59           | 55/52/66; 1/2       |                                |
| sY123     | 64, 66           | 45/55/65; 1/4       | 63                             |
|           | 56, 57           | 54/60/64; 1/2       |                                |
| sY126     | 60, 62, 64       | 45/55/68; 3/6.5     | 64-54/54 (touchdown PCR)       |
|           | 56, 58           | 50/56/60; 1/2       |                                |
| SMCY      | 56, 58, 60       | 45/55/68; 3.0/6.5   | 54                             |
|           | 56, 57           | 55/61/65; 1/2       |                                |

DHPLC gradient conditions: The gradient is composed of buffer A (0.1 M triethylammonium acetate with 0% acetonitrile) and buffer B (0.1 M triethylammonium acetate with 25% acetonitrile). The numbers in the column indicate: percent B that the sample is being loaded into, start point of gradient in percent B, endpoint of gradient; followed by the number of minutes from loading to the start point and then the number of minutes from starting to ending point in the gradient.

PCR conditions: denaturation for 5 min, followed by 35 cycles of 30 sec at 95°C (denaturation), 30 sec at the annealing temperature noted in the table, and 30 sec at 72°C, and finally 5 min at 72°C.

Touchdown PCR: denaturation for 5 min, followed by 20 cycles of 30 sec at 95°C (denaturation), 30 sec at the first annealing temperature noted in the table with 0.5°C subtracted from the annealing temperature in each successive cycle, and 30 sec at 72°C.

This is followed by 20 cycles of PCR that consist of 30 sec at 95°C, 30 sec at the annealing temperature given after the slash, and 30 sec at 72°C, and finally, 5 min at 72°C.
